# Supplementary material for: The Effect of Resveratrol on Mitochondrial Function in Myoblasts of Patients with the Common m.3243A>G Mutation
Source: PubMed Central journal article supplement (PMC7464358; doi:10.3390/biom10081103), 2020-07-24
Supplement: biomolecules-10-01103-s001.pdf [file biomolecules-10-01103-s001.pdf]

Supplementary Materials:

**The effect of resveratrol on mitochondrial function in Myoblasts of patients with the common m.3243A>G mutation**

Leila Motlagh Scholle , Helena Schieffers, SamiyaAl-Robaiy, Annemarie Thaele, Faramarz Dehghani, Diana Lehmann Urban, and Stephan Zierz

**Table 1.** Comparison of the mean values of basal (BR), maximal respiration (MR), ATP production and spare respiratory capacity (SRC) measured under normal (N) or restricted (R) conditions in patients (n=5) and controls (n=5). *p* values are only shown in case of significant differences between two conditions. -RSV = without RSV.

| Controls |             |             |                   |                |             |                |                |             |                |
|----------|-------------|-------------|-------------------|----------------|-------------|----------------|----------------|-------------|----------------|
|          | -RSV        |             |                   | 10 $\mu$ M RSV |             |                | 20 $\mu$ M RSV |             |                |
|          | N<br>(mean) | R<br>(mean) | <i>p</i><br>value | N<br>(mean)    | R<br>(mean) | <i>p</i> value | N<br>(mean)    | R<br>(mean) | <i>p</i> value |
| Basal    | 59.24       | 14.19       | <0.0001           | 56.11          | 18.91       | <0.0001        | 45.44          | 24.84       | <0.0001        |
| MR       | 212.3       | 78.04       | <0.0001           | 191.3          | 87.21       | <0.0001        | 190.4          | 103.8       | <0.0001        |
| SRC      | 156.4       | 57.88       | <0.0001           | 135.2          | 68.79       | 0.0006         | 137.3          | 79.22       | <0.01          |
| ATP      | 45.64       | 10.67       | <0.0001           | 40.39          | 18.9        | <0.0001        | 37.24          | 24.84       | 0.0005         |

  

| Patients |             |             |                   |                |             |                |                |             |                |
|----------|-------------|-------------|-------------------|----------------|-------------|----------------|----------------|-------------|----------------|
|          | -RSV        |             |                   | 10 $\mu$ M RSV |             |                | 20 $\mu$ M RSV |             |                |
|          | N<br>(mean) | R<br>(mean) | <i>p</i><br>value | N<br>(mean)    | R<br>(mean) | <i>p</i> value | N<br>(mean)    | R<br>(mean) | <i>p</i> value |
| Basal    | 41.71       | 16.52       | <0.0001           | 39.19          | 23.8        | <0.0001        | 35.44          | 21          | 0.0004         |
| MR       | 153.3       | 66.87       | <0.0001           | 169.2          | 81.92       | <0.0001        | 164            | 71.5        | <0.0001        |
| SRC      | 144.1       | 50.34       | <0.0001           | 115.8          | 62.84       | 0.02           | 116.8          | 48.38       | <0.0001        |
| ATP      | 33.51       | 12.45       | <0.0001           | 28.82          | 23.8        |                | 29.4           | 21          | 0.02           |

**Table 2.** Relative expression rates of the genes *SIRT1*, *SIRT3*, *PGC-1 $\alpha$* , *Nrf1* and *Tfam* in myoblasts between patients (n=5) and controls (n=5) under normal (N) or restricted (R) conditions. *p* values are only shown in case of significant difference between patients and controls. -RSV = without RSV.

| N conditions                    |                    |                    |                   |                    |                    |                   |                    |                    |                |
|---------------------------------|--------------------|--------------------|-------------------|--------------------|--------------------|-------------------|--------------------|--------------------|----------------|
|                                 | -RSV               |                    |                   | 10 $\mu$ M RSV     |                    |                   | 20 $\mu$ M RSV     |                    |                |
|                                 | Controls<br>(mean) | Patients<br>(mean) | <i>p</i><br>value | Controls<br>(mean) | Patients<br>(mean) | <i>p</i><br>value | Controls<br>(mean) | Patients<br>(mean) | <i>p</i> value |
| <i>SIRT1</i>                    | 0.56               | 1.26               |                   | 2.65               | 2.463              |                   | 0.84               | 0.67               |                |
| <i>SIRT3</i>                    | 0.4                | 0.77               |                   | 1.77               | 1.49               |                   | 1.07               | 0.57               |                |
| <i>PGC-1<math>\alpha</math></i> | 0.3                | 0.27               |                   | 1.41               | 0.94               |                   | 0.45               | 0.54               |                |
| <i>Nrf1</i>                     | 0.57               | 0.93               |                   | 2.68               | 1.21               | 0.04              | 1.16               | 0.9                |                |
| <i>Tfam</i>                     | 2.99               | 2.71               |                   | 12.44              | 8.34               | 0.01              | 4.96               | 1.53               | 0.03           |

  

| R conditions                    |                    |                    |                   |                    |                    |                   |                    |                    |                |
|---------------------------------|--------------------|--------------------|-------------------|--------------------|--------------------|-------------------|--------------------|--------------------|----------------|
|                                 | -RSV               |                    |                   | 10 $\mu$ M RSV     |                    |                   | 20 $\mu$ M RSV     |                    |                |
|                                 | Controls<br>(mean) | Patients<br>(mean) | <i>p</i><br>value | Controls<br>(mean) | Patients<br>(mean) | <i>p</i><br>value | Controls<br>(mean) | Patients<br>(mean) | <i>p</i> value |
| <i>SIRT1</i>                    | 2.04               | 3.19               |                   | 0.82               | 0.95               |                   | 7.1                | 5.82               |                |
| <i>SIRT3</i>                    | 2.1                | 2.9                |                   | 1.47               | 1.36               |                   | 3.46               | 1.45               | 0.003          |
| <i>PGC-1<math>\alpha</math></i> | 17.8               | 4.7                | <0.0001           | 8.3                | 3.78               | 0.005             | 19.97              | 4.43               | <0.0001        |
| <i>Nrf1</i>                     | 1.87               | 2.97               |                   | 0.77               | 0.79               |                   | 3.51               | 3.7                |                |
| <i>Tfam</i>                     | 4.45               | 4.4                |                   | 2.67               | 2.27               |                   | 7.55               | 2.7                | 0.002          |
